# Supplementary material for: Systemic Inflammation and the Increased Risk of Inflamm-Aging and Age-Associated Diseases in People Living With HIV on Long Term Suppressive Antiretroviral Therapy
Source: PubMed Central journal article supplement (PMC6718454; doi:10.3389/fimmu.2019.01965), 2019-08-27

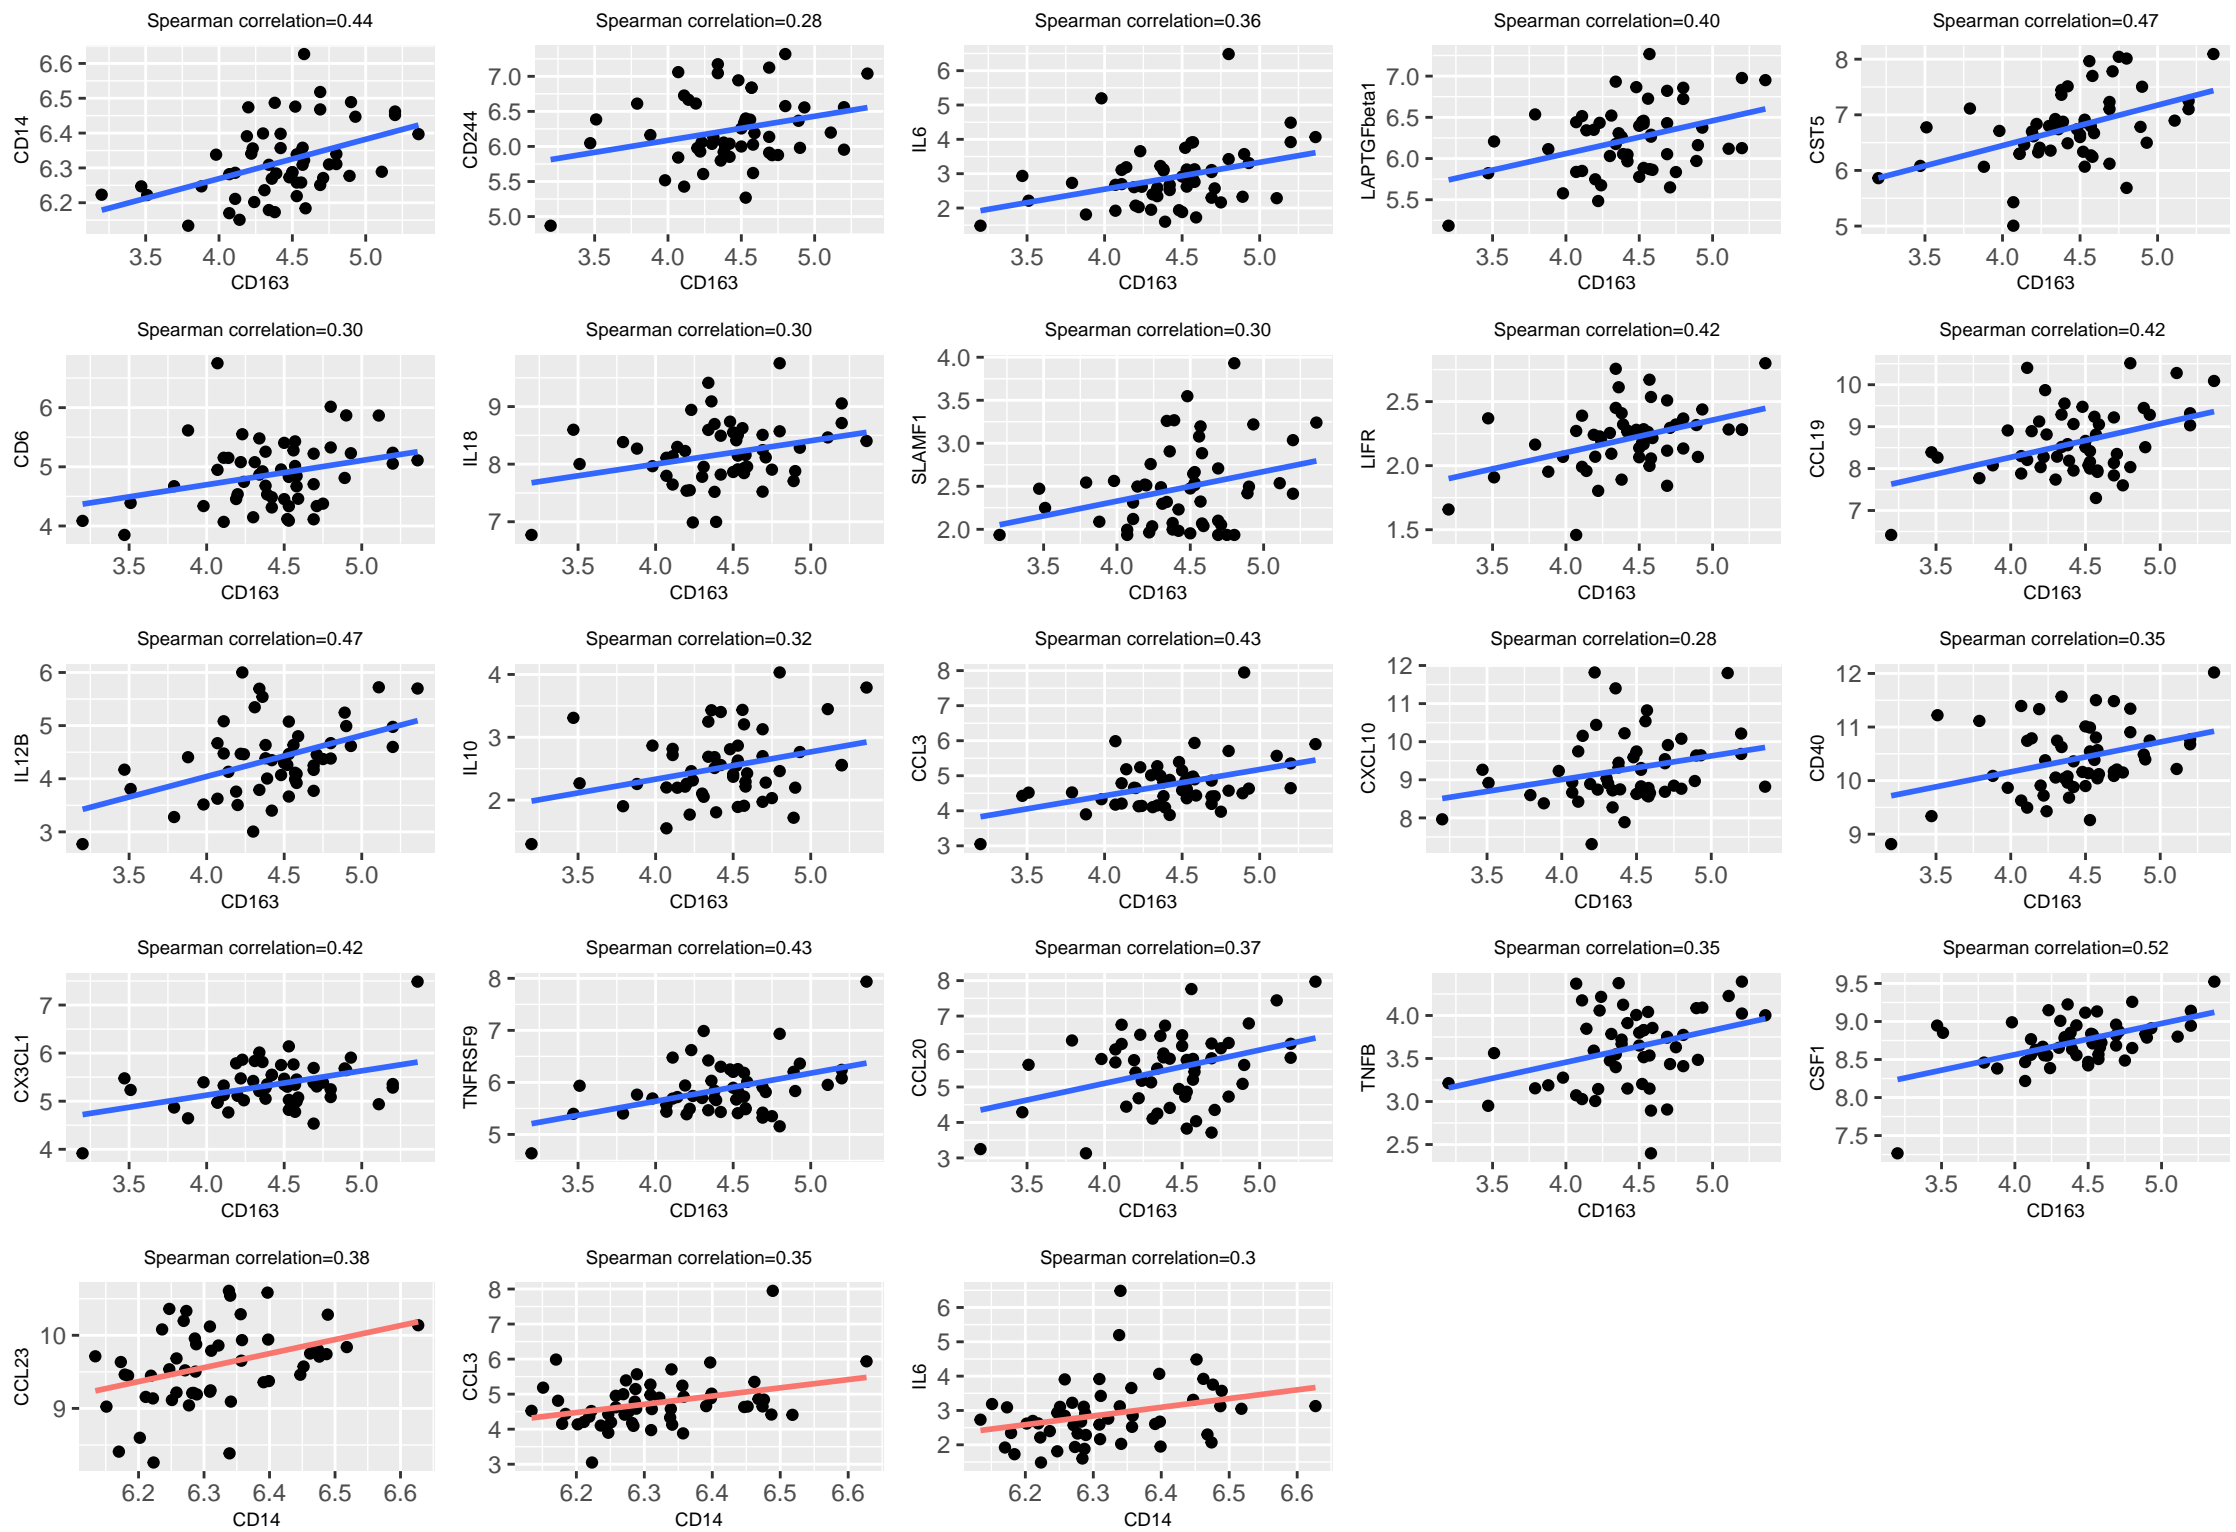

Supplement: Image_1.pdf [file Image_1.pdf]
